# Supplementary material for: Dielectric properties of pyridine–ethanol mixtures: density functional theory and experiments
Source: Royal Society of Chemistry journal article supplement (doi:10.1039/c6ra11038j), 2016-01-01
Supplement: c6ra11038j1.pdf [file c6ra11038j1.pdf]

## Supplementary Information:

### Supplementary Figures

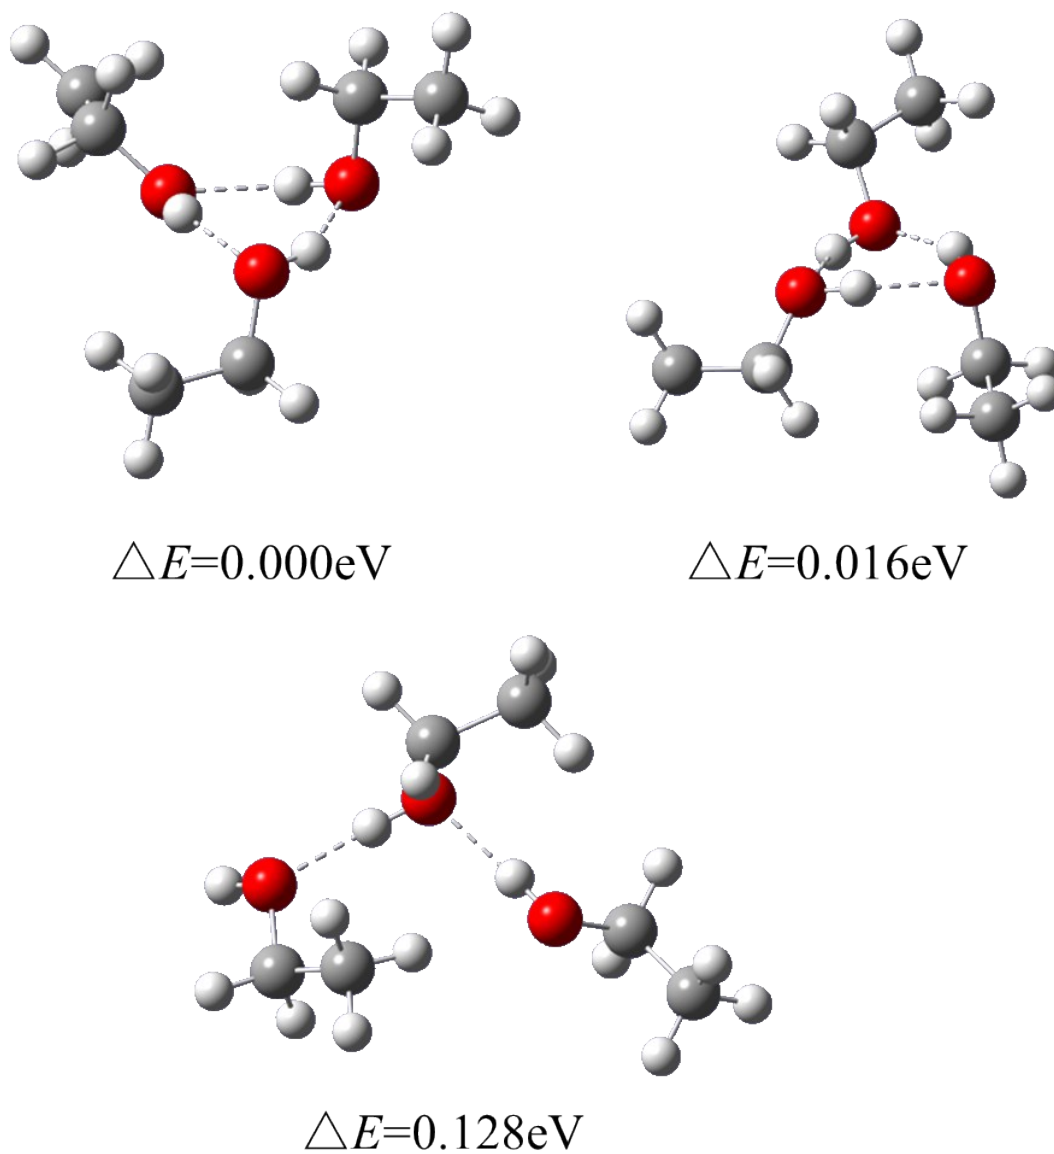

**Supplementary Fig. 1.** Relative energies  $\Delta E$  and the structures of  $(\text{C}_2\text{H}_5\text{OH})_3$  molecular clusters.

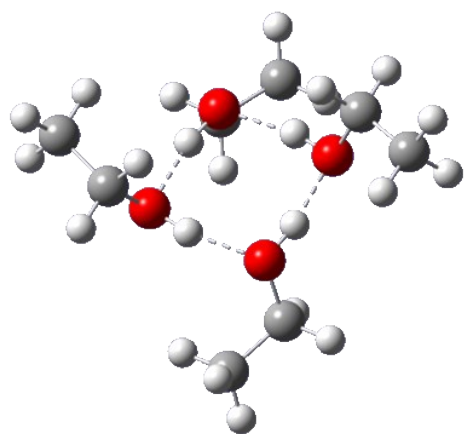

$$\Delta E = 0.000 \text{ eV}$$

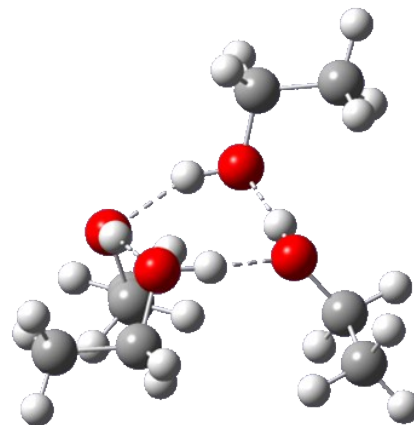

$$\Delta E = 0.010 \text{ eV}$$

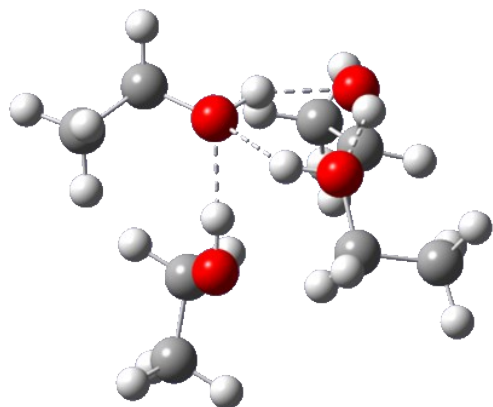

$$\Delta E = 0.14 \text{ eV}$$

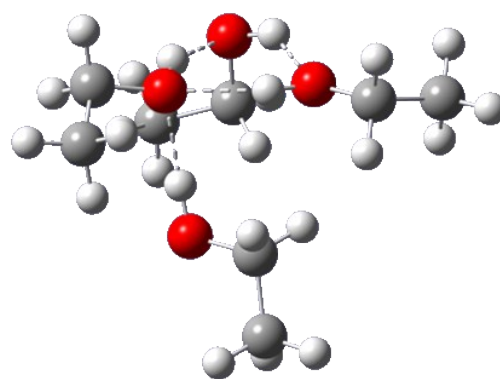

$$\Delta E = 0.18 \text{ eV}$$

**Supplementary Fig. 2.** Relative energies  $\Delta E$  and the structures of  $(\text{C}_2\text{H}_5\text{OH})_4$  molecular clusters.

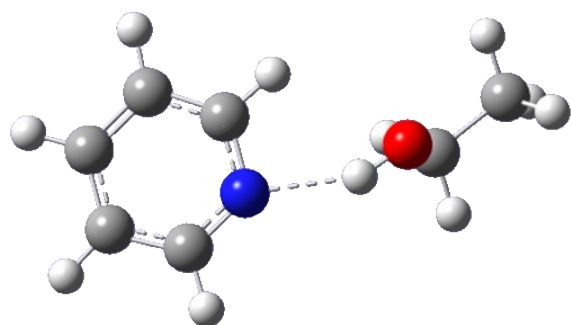

$$\Delta E = 0.000 \text{ eV}$$

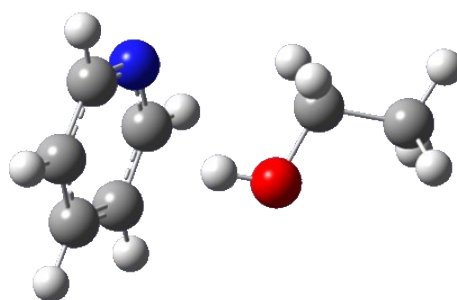

$$\Delta E = 0.166 \text{ eV}$$

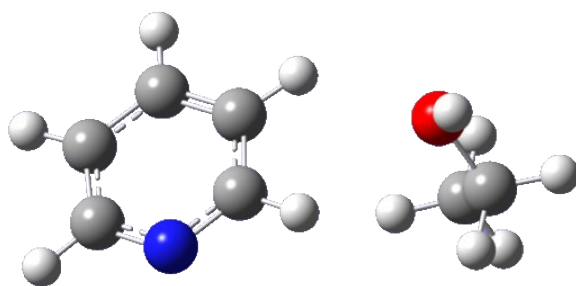

$$\Delta E = 0.195 \text{ eV}$$

**Supplementary Fig. 3.** Relative energies  $\Delta E$  and the structures of  $(\text{C}_5\text{H}_5\text{N})(\text{C}_2\text{H}_5\text{OH})$  molecular clusters.

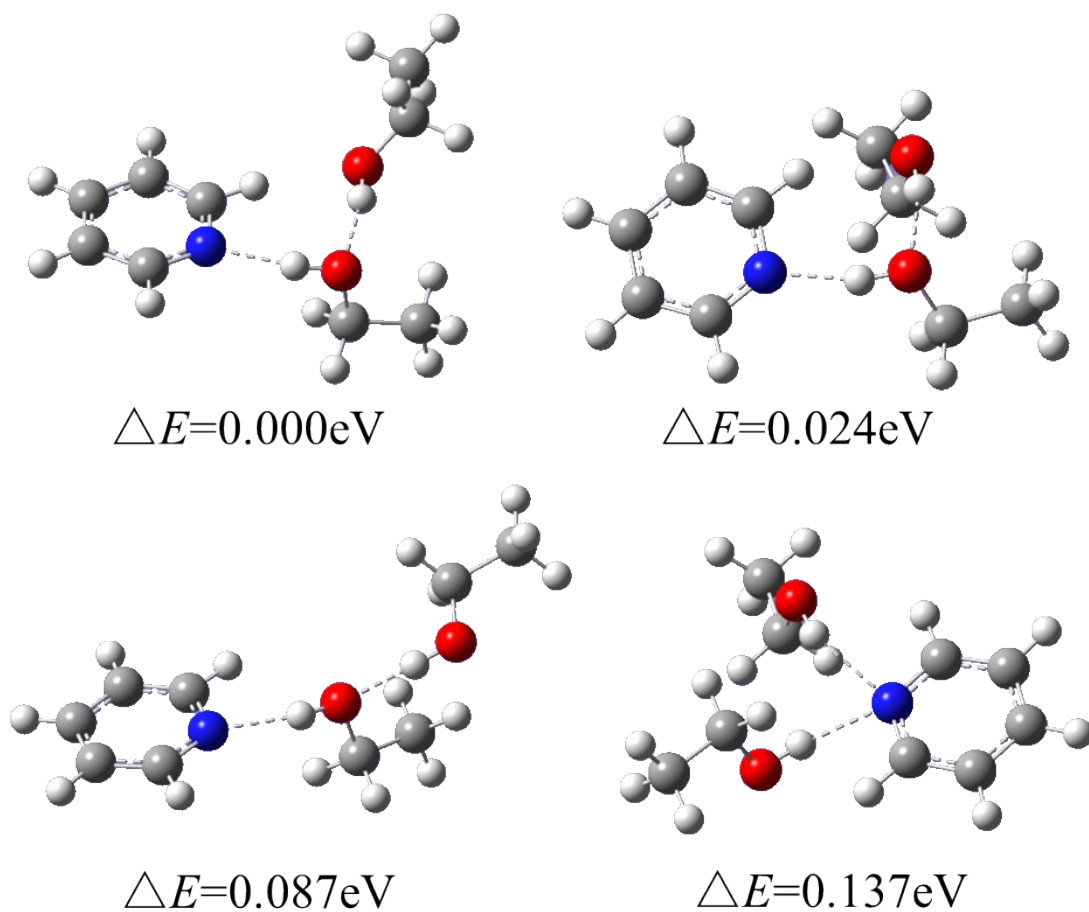

**Supplementary Fig. 4.** Relative energies  $\Delta E$  and the structures of  $(\text{C}_3\text{H}_5\text{N})(\text{C}_2\text{H}_5\text{OH})_2$  molecular clusters.

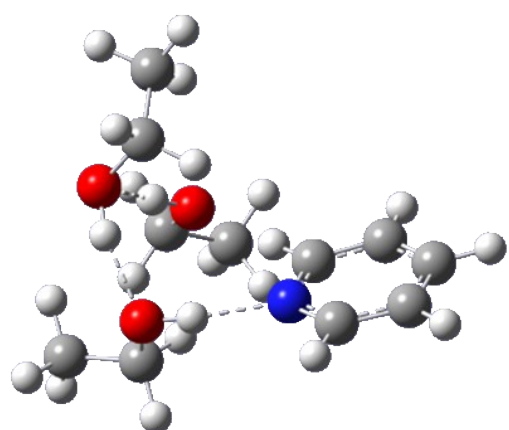

$$\Delta E = 0.000 \text{ eV}$$

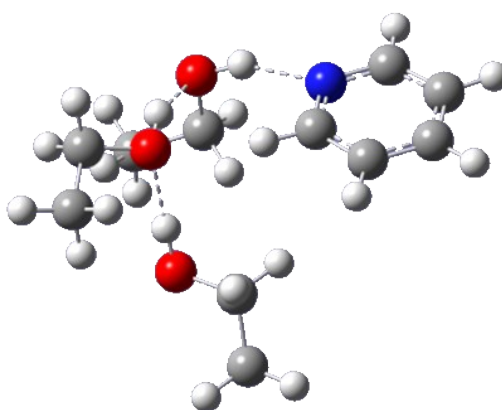

$$\Delta E = 0.056 \text{ eV}$$

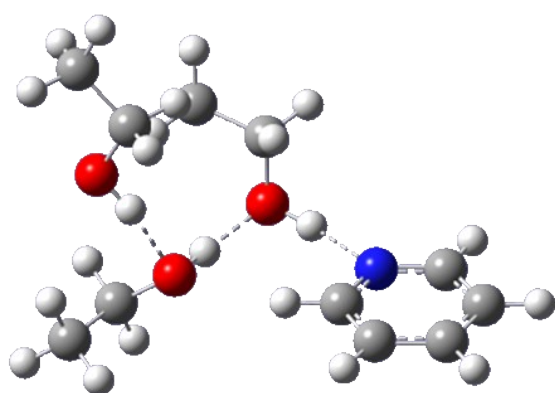

$$\Delta E = 0.088 \text{ eV}$$

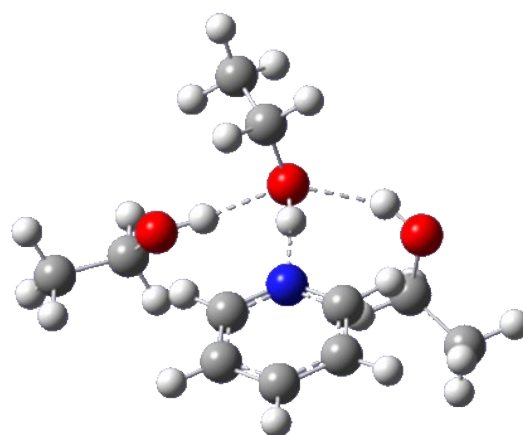

$$\Delta E = 0.103 \text{ eV}$$

**Supplementary Fig. 5.** Relative energies  $\Delta E$  and the structures of  $(\text{C}_5\text{H}_5\text{N})(\text{C}_2\text{H}_5\text{OH})_3$  molecular clusters.

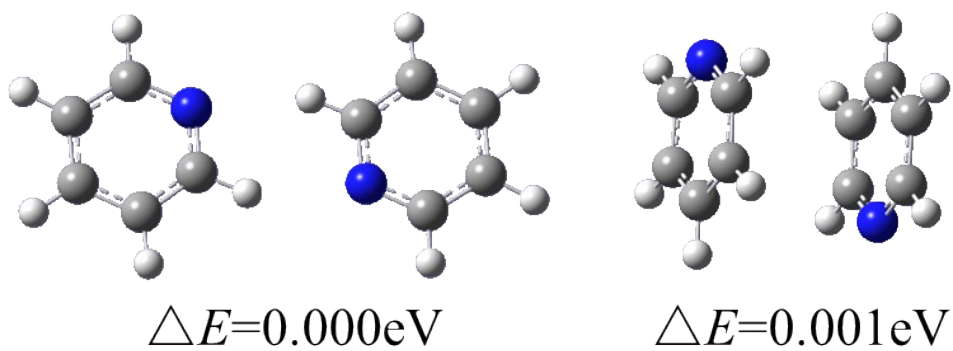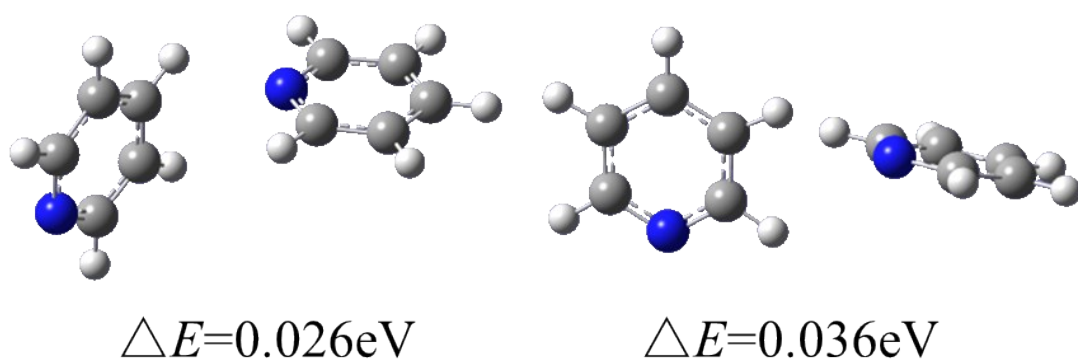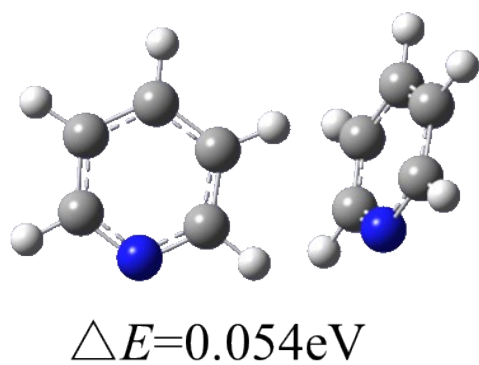

**Supplementary Fig. 6.** Relative energies  $\Delta E$  and the structures of  $(\text{C}_5\text{H}_5\text{N})_2$  molecular clusters.

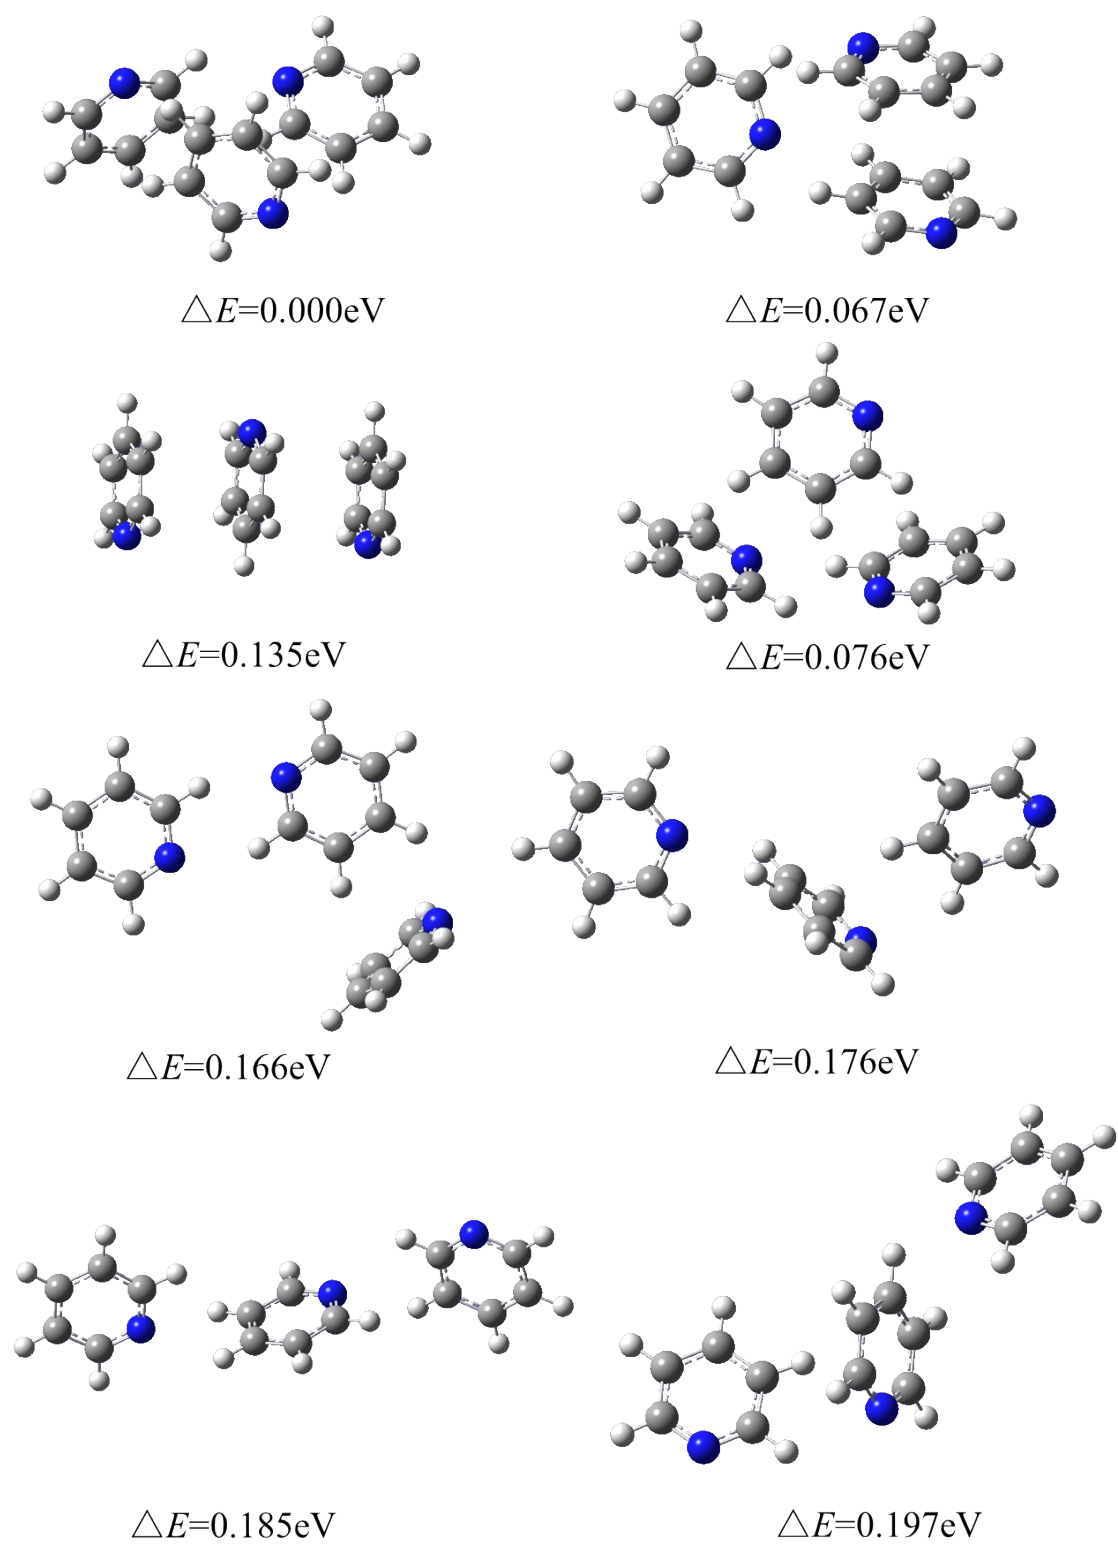

**Supplementary Fig. 7.** Relative energies  $\Delta E$  and the structures of  $(\text{C}_5\text{H}_5\text{N})_3$  molecular clusters.
